# Supplementary material
Source: Royal Society of Chemistry journal article supplement (doi:10.1039/d6nr01221c)
Supplement: d6nr01221c1.pdf [file d6nr01221c1.pdf]

## **Moderate Ce Doping Enables Outstanding Oxygen Evolution Activity and Stability in CoMn-LDH Nanosheets**

Wenjie Cao<sup>a,b,‡</sup>, Yangchun Guo<sup>a,b,‡</sup>, Kuan Wang<sup>b,\*</sup>, Yuhao Zhou<sup>a</sup>, Xuan Zhao<sup>a,b</sup>, Yinfeng Wang<sup>a,b</sup>, Zhenhong He<sup>b</sup>, Shufang Ma<sup>a</sup>, Bingshe Xu<sup>a,c</sup>, Xiaodong Hao<sup>a,\*</sup>

*<sup>a</sup>Xi'an Key Laboratory of Compound Semiconductor Materials and Devices, School of Physics & Information Science, Shaanxi University of Science & Technology, Xi'an 710021, China*

*<sup>b</sup>Shaanxi Key Laboratory of Chemical Additives for Industry, College of Chemistry and Chemical Engineering, Shaanxi University of Science & Technology, Xi'an 710021, China*

*<sup>c</sup>Key Laboratory of Interface Science and Engineering in Advanced Materials, Ministry of Education, Taiyuan University of Technology, Taiyuan, 030024, China*

\*Corresponding author: E-mail: (X. Hao) hao.xiaodong@sust.edu.cn; (Kuan Wang) wangkuan@sust.edu.cn;

‡W. Cao and Y. Guo contributed equally to this work.

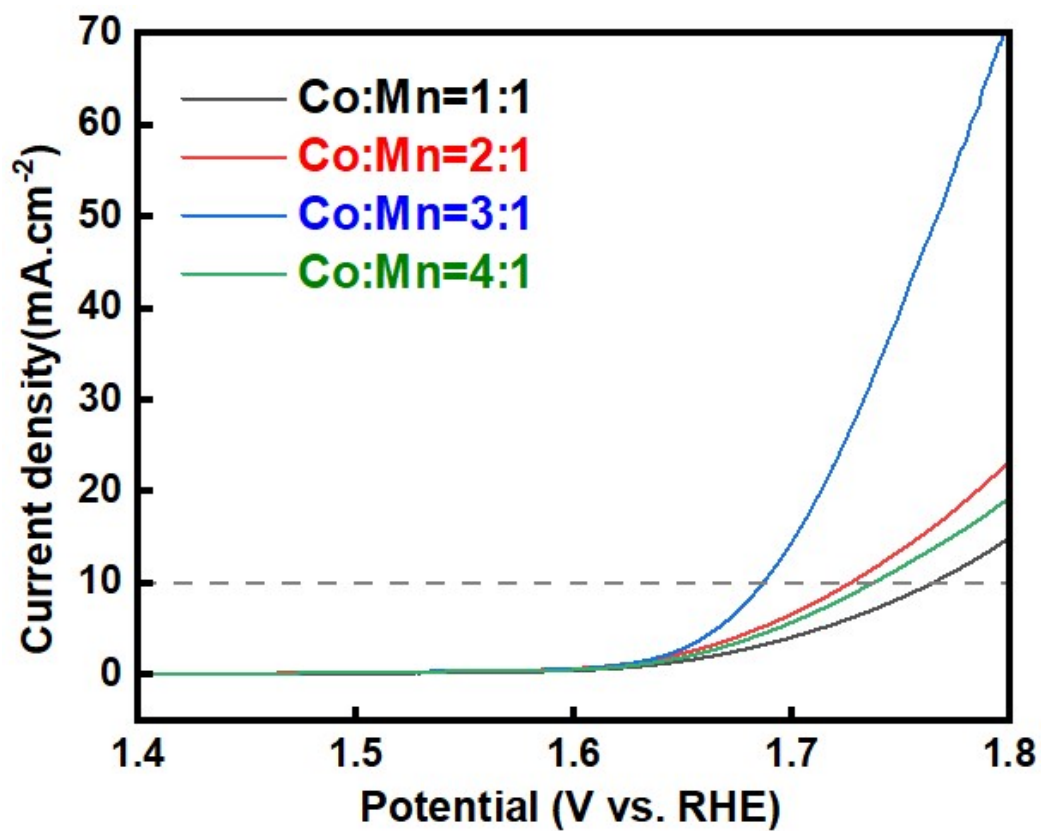

**Fig. S1** Effect of different Co/Mn molar ratios on the OER catalytic performance of CM-LDH catalysts and determination of the optimal ratio

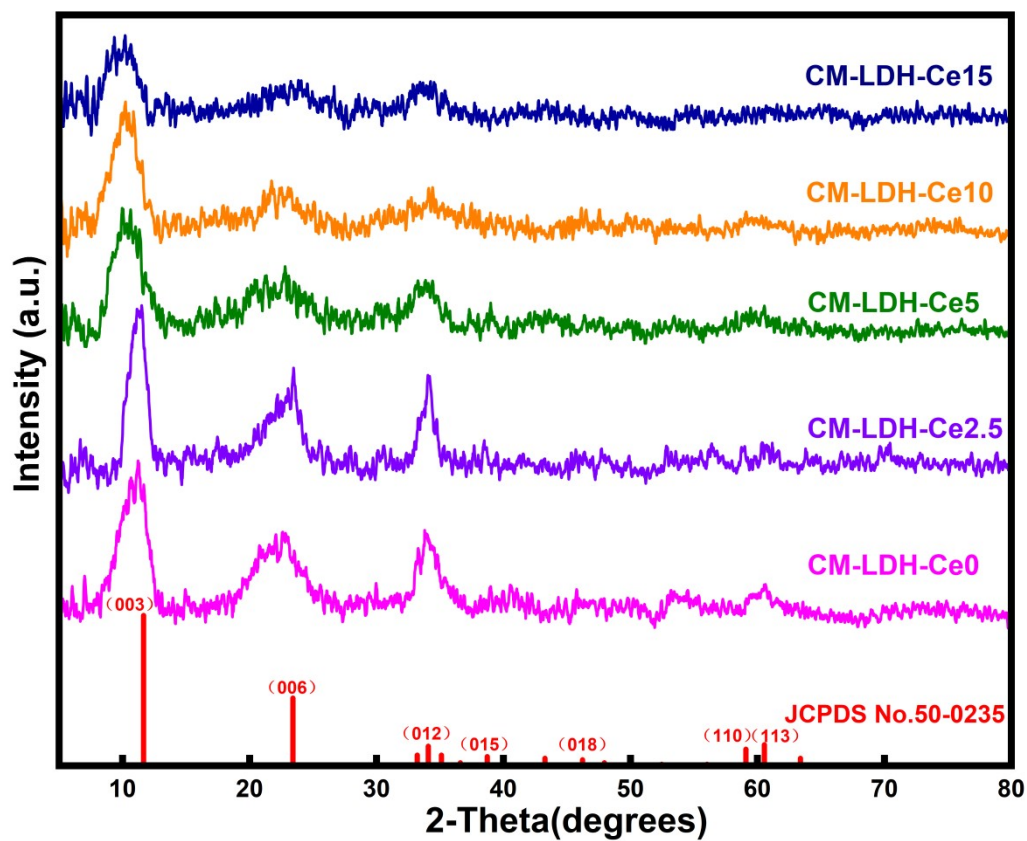

**Fig. S2** XRD patterns of CM-LDH-Ce with different Ce doping ratios (0%, 2.5%, 5%, 10%, 15%).

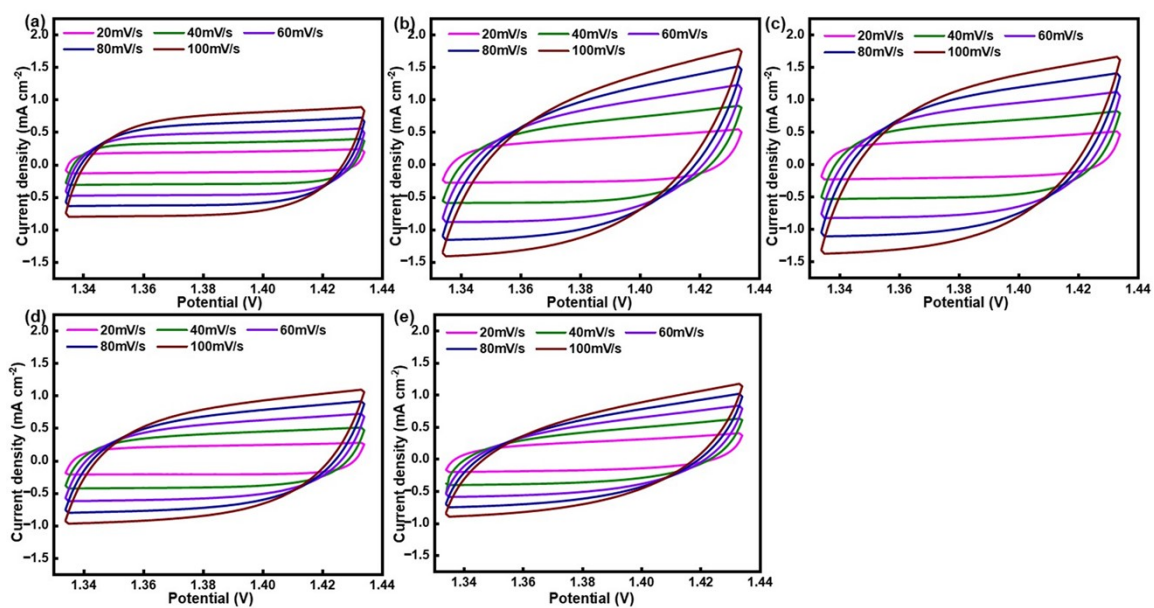

**Fig. S3** Cyclic Voltammetry (CV) Curves and Electrochemical Reversibility Analysis of CM-LDH-Ce Catalysts with Different Ce Doping Contents

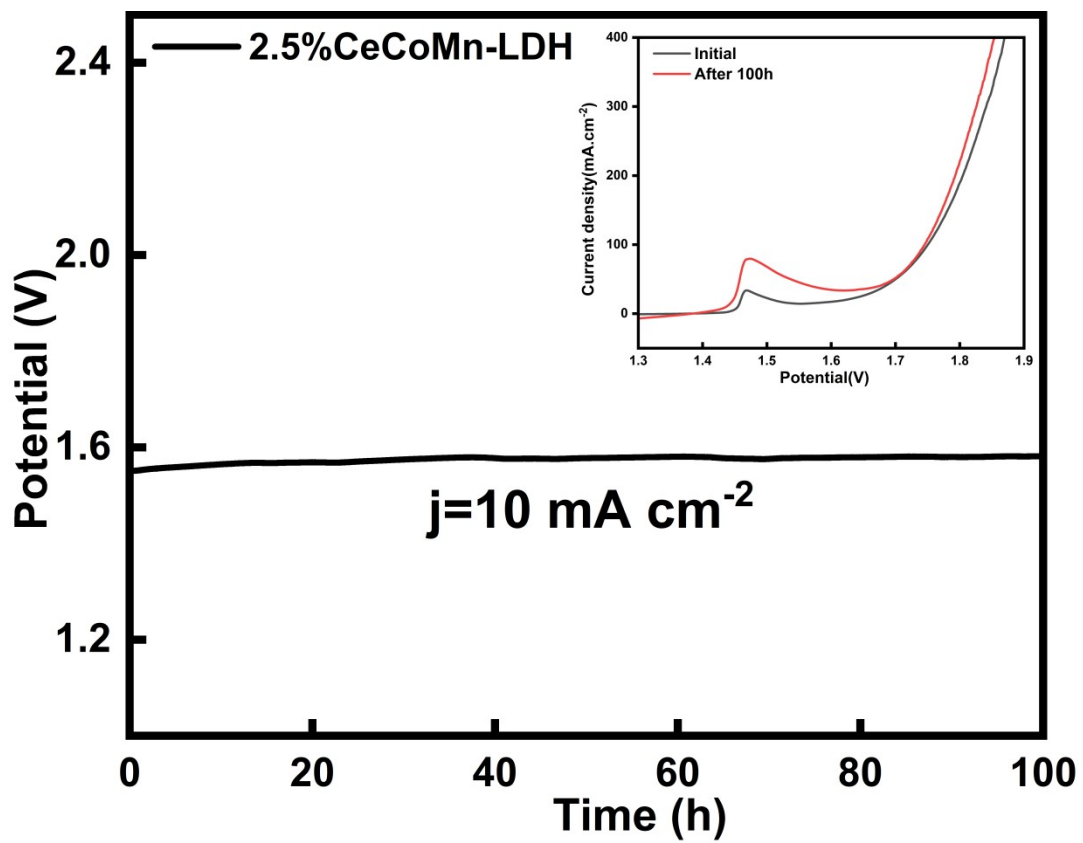

Fig. S4 Stability curve of CM-LDH-Ce2.5 at a current density of  $10 \text{ mA cm}^{-2}$

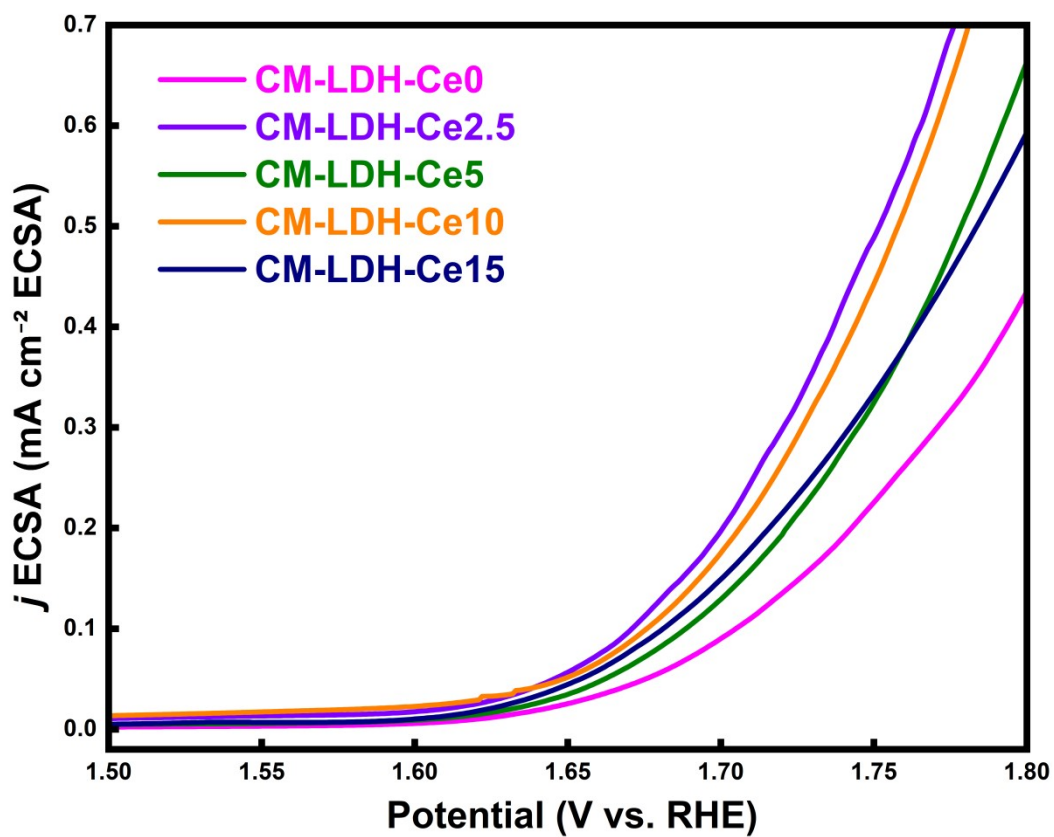

Fig. S5 ECSA-normalized LSV curves of CM-LDH-Ce catalysts.

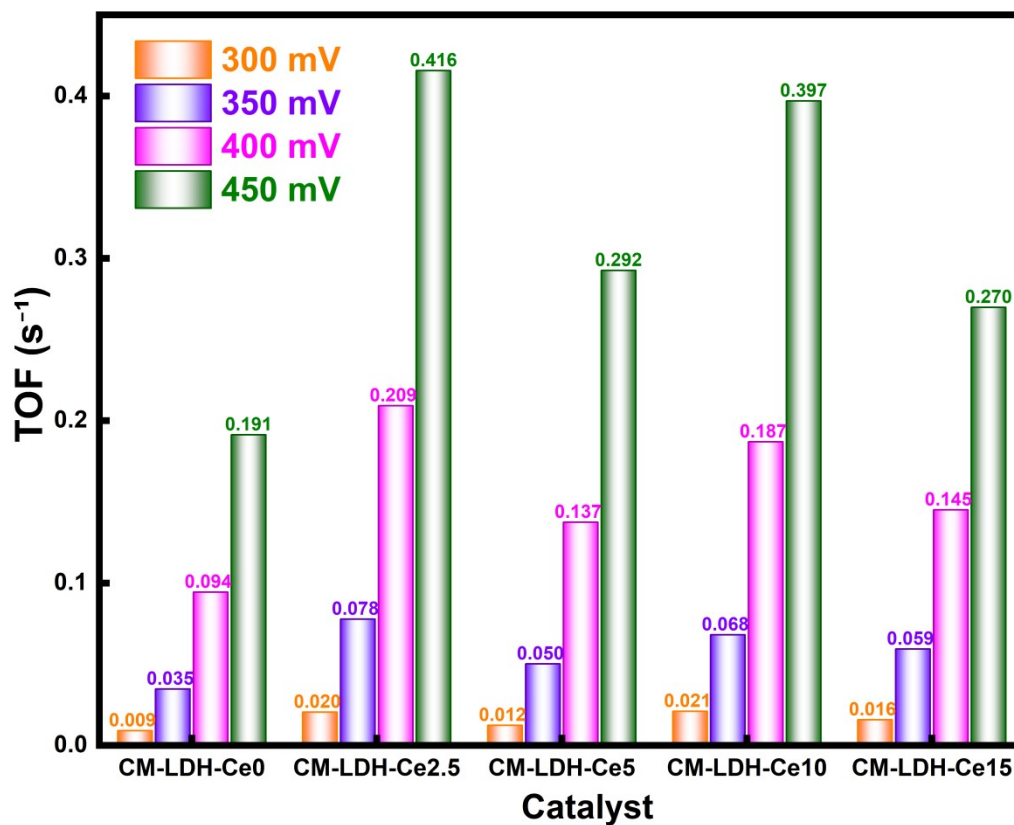

**Fig. S6** Bar Chart Showing Turnover Frequency (TOF,  $s^{-1}$ ) Values for CM-LDH-Ce Catalysts with Varying Ce Doping Contents, Measured at Fixed Overpotentials of 300, 350, 400, and 450 mV.

**Table S1** XPS Valence State Peak Area Percentages of CM-LDH-Ce Catalysts with Different Ce Doping Contents.

|              | Proportion of Co peak area % |                  | Proportion of Mn peak area % |                  | Proportion of O peak area % |                 |                | Proportion of Ce peak area % |                  |
|--------------|------------------------------|------------------|------------------------------|------------------|-----------------------------|-----------------|----------------|------------------------------|------------------|
|              | Co <sup>2+</sup>             | Co <sup>3+</sup> | Mn <sup>2+</sup>             | Mn <sup>3+</sup> | H-O                         | OH <sup>-</sup> | V <sub>O</sub> | Ce <sup>3+</sup>             | Ce <sup>4+</sup> |
|              | CM-LDH-Ce0                   | 46.03            | 53.98                        | 49.13            | 50.87                       | 2.30            | 90.15          | 7.55                         |                  |
| CM-LDH-Ce2.5 | 56.70                        | 43.30            | 49.59                        | 50.41            | 2.11                        | 89.68           | 8.21           | 22.96                        | 77.03            |
| CM-LDH-Ce5   | 61.52                        | 38.48            | 44.42                        | 55.58            | 1.56                        | 89.56           | 8.88           | 20.54                        | 79.45            |

**Table S2** XPS Valence State Percentages of CM-LDH-Ce Catalysts with Different Ce Doping Contents.

|              | Valence state ratio of<br>Co (Co <sup>2+</sup> /Co <sup>3+</sup> ) | Valence state ratio of<br>Mn (Mn <sup>2+</sup> /Mn <sup>3+</sup> ) | Valence state ratio of<br>Ce (Ce <sup>3+</sup> /Ce <sup>4+</sup> ) |
|--------------|--------------------------------------------------------------------|--------------------------------------------------------------------|--------------------------------------------------------------------|
| CM-LDH-Ce0   | 0.85                                                               | 0.97                                                               |                                                                    |
| CM-LDH-Ce2.5 | 1.31                                                               | 0.98                                                               | 0.30                                                               |
| CM-LDH-Ce5   | 1.59                                                               | 0.80                                                               | 0.26                                                               |

**Table S3** Table of Original EPR Peak Areas and Relative Oxygen Vacancy Contents of CM-LDH-Ce Catalysts with Different Ce Doping Contents.

| Ce doping content (%) | Original EPR peak area (a.u.) | Relative oxygen vacancy content (taking 0% Ce as 1) |
|-----------------------|-------------------------------|-----------------------------------------------------|
| 0                     | $4.23631 \times 10^{-4}$      | 1.00                                                |
| 2.5                   | $5.8696 \times 10^{-4}$       | 1.38                                                |
| 5                     | $7.50053 \times 10^{-4}$      | 1.77                                                |

**Table S4** Comprehensive comparison of OER performance of recently reported doped/activated LDH-based electrocatalysts in alkaline media (including additional catalysts and detailed metrics).

| Catalyst                                                  | LDH host    | Strategy              | Conc. levels   | Substrate  | $\eta_{10}$ (mV) | $\eta_{500}$ (mV) | Tafel (mV dec <sup>-1</sup> ) | Stability (h)                                                             |
|-----------------------------------------------------------|-------------|-----------------------|----------------|------------|------------------|-------------------|-------------------------------|---------------------------------------------------------------------------|
| <b>CM-LDH-Ce2.5 (This work)</b>                           | <b>CoMn</b> | <b>Ce doping</b>      | <b>5</b>       | <b>GCE</b> | <b>287</b>       | <b>500</b>        | <b>87.12</b>                  | <b>200 h @ 100 mA cm<sup>-2</sup></b>                                     |
| N@CoMn-LDH/CC <sup>1</sup>                                | CoMn        | N <sub>2</sub> plasma | 2              | CC         | 219              | –                 | 39.6                          | >50 h @ 100 mA cm <sup>-2</sup>                                           |
| V <sub>Mn</sub> -MnCo-LDH/NF <sup>2</sup>                 | MnCo        | Mn vacancy            | 7 <sup>a</sup> | NF         | 253              | –                 | 38.63                         | 120 h @ 50 mA cm <sup>-2</sup>                                            |
| Ce-NiFe LDH/NF <sup>3</sup>                               | NiFe        | Ce doping             | 2              | NF         | – <sup>b</sup>   | 268               | 60.25                         | 250 h @ 1 A cm <sup>-2</sup><br>500 h @ 1 A cm <sup>-2</sup> <sup>c</sup> |
| Ce@CoFe-LDH <sup>4</sup>                                  | CoFe        | Ce doping + interface | 2              | NF         | 207              | –                 | 50.0                          | 120 h @ 100 mA cm <sup>-2</sup>                                           |
| Ce-CoFe-LDH/NF <sup>5</sup>                               | CoFe        | Ce doping             | 2              | NF         | 225              | –                 | 34.34                         | 24 h @ 50 mA cm <sup>-2</sup>                                             |
| CeLa-CoNiFe-LDH <sup>6</sup>                              | CoNiFe      | Ce+La co-doping       | 2              | NF         | 175              | 424               | –                             | 120h @ 10 mA cm <sup>-2</sup>                                             |
| CoFe <sub>0.75</sub> Mn <sub>0.25</sub> -LDH <sup>7</sup> | CoFe        | Mn ternary            | 4 <sup>a</sup> | NF         | 225 <sup>d</sup> | –                 | 133.0 <sup>e</sup>            | 30 h @ 50 mA cm <sup>-2</sup>                                             |
| ZnCo <sub>2</sub> O <sub>4</sub> @NiCo-LDH <sup>8</sup>   | NiCo        | Interface eng.        | –              | NF         | 296.1            | –                 | 24.13                         | 12 h @ 10 mA cm <sup>-2</sup>                                             |

<sup>a</sup> Precursor molar ratio variation, not doping concentration levels.

<sup>b</sup>  $\eta_{10}$  not individually reported; the original paper focuses on ampere-level current densities ( $\eta$  at 1 A cm<sup>-2</sup> = 324 mV in 1 M KOH;  $\eta$  at 1 A cm<sup>-2</sup> = 390 mV in 1 M KOH + seawater).

<sup>c</sup> 250 h measured in 1 M KOH at 1 A cm<sup>-2</sup>; 500 h measured in 1 M KOH + seawater at 1 A cm<sup>-2</sup>.

<sup>d</sup> Reported as  $\eta_{20}$  in the original paper;  $\eta_{10}$  value is approximately 225 mV.

<sup>e</sup> Tafel slope calculated at 100 mA cm<sup>-2</sup>.

GCE = glassy carbon electrode (drop-cast); NF = nickel foam (self-supported); CC = carbon cloth (self-supported). All data measured in 1.0 M KOH unless otherwise specified. “–” indicates the value was not reported in the original paper.

## References

- 1 L. Yang, Q. Lin, D. Guo, L. Wu, Z. Guan, H. Jin, G. Fang, X. a. Chen and S. Wang, *Inorg. Chem.*, 2023, **62**, 17565–17574.
- 2 B. Li, L. Dai, G. Su, Z. Xia, Y. Ye and Z. Li, *Fuel*, 2024, **364**, 130961.
- 3 Y. Yao, S. Sun, H. Zhang, Z. Li, C. Yang, Z. Cai, X. He, K. Dong, Y. Luo, Y. Wang, Y. Ren, Q. Liu, D. Zheng, W. Zhuang, B. Tang, X. Sun and W. Hu, *J. Energy Chem.*, 2024, **91**, 306–312.
- 4 X. Sun, R. Wang, Q. Wang and K. Ostrikov, *Inorg. Chem. Front.*, 2024, **11**, 1458–1471.
- 5 N. Wang, X. Wang, Y. Shan, J. Liu, J. Zhang, K. Chen and X. Yu, *React. Chem. Eng.*, 2023, **8**, 2746–2756.
- 6 R. R. K. P., P. Wang, M. He, S. Meng, J. Yao, H. Li, C. Yang and Z. Li, *Sci. China Chem.*, 2024, **67**, 2586–2598.
- 7 Y. Zheng, K. Sun, J. Pang, J. Hou, G. Wang, W. Guo, L. Wang, X. Guo and L. Chen, *J. Alloys Compd.*, 2022, **925**, 166754.
- 8 R.-Y. Li, S.-L. Xu, Z.-Q. Ai, J.-G. Qi, F.-F. Wu, R.-D. Zhao and D.-P. Zhao, *Int. J. Hydrogen Energy*, 2024, **91**, 867–876.
